# Supplementary material for: Synthesis of mesh-like Fe2O3/C nanocomposite via greener route for high performance supercapacitors
Source: Royal Society of Chemistry journal article supplement (doi:10.1039/c3ra45025b), 2013-11-01
Supplement: c3ra45025b.pdf [file c3ra45025b.pdf]

## Synthesis of mesh like Fe<sub>2</sub>O<sub>3</sub>/C nanocomposite via greener route for high performance supercapacitors

Balasubramanian Sethuraman<sup>1</sup>, Kamatchi Kamaraj Purushothaman<sup>\*1</sup>, Gopalan Muralidharan<sup>2</sup>

<sup>\*1</sup>Department of Physics, TRP Engineering College (SRM group), Irungalur, Tamilnadu.

<sup>2</sup>Department of Physics, Gandhigram Rural University, Gandhigram-624302, Tamilnadu, India.

### Supporting Information

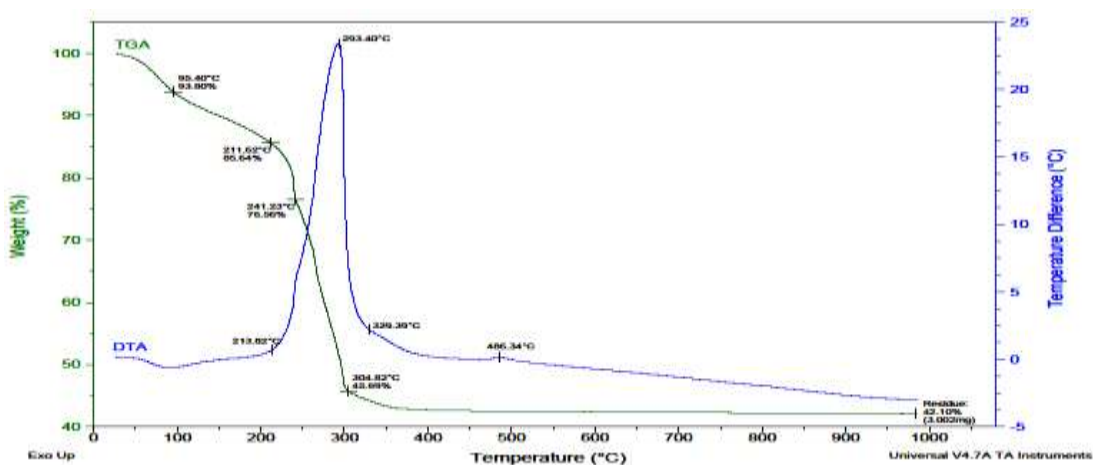

**Figure S1.** TG – DTA traces illustrating the thermal decomposition of the as prepared material.

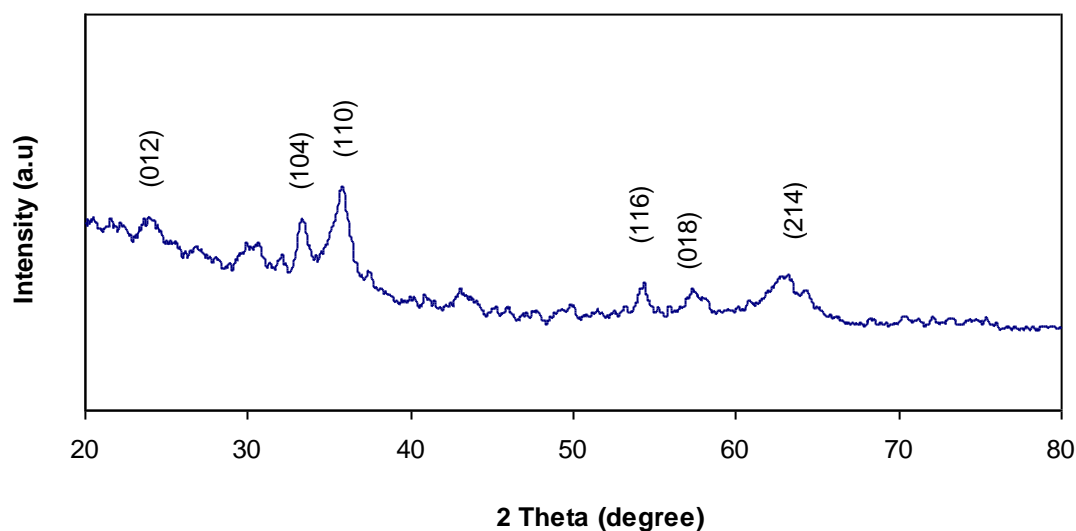

**Figure S2.** XRD pattern of Fe<sub>2</sub>O<sub>3</sub>/C annealed at 300 °C
